# Supplementary material
Source: Research Square preprint supplement (doi:10.21203/rs.3.rs-7723268/v1)
Supplement: Supplementary file 1 [file 17879e3b4ba312c611337045.docx]

**Annex A. Survey on Faculty Internationalization**

The questionnaire was designed using a mixed-method approach (closed and open-ended questions) and was structured into eight key dimensions. Each dimension included questions aimed at exploring faculty profiles, their participation in internationalization activities, and the factors influencing their involvement.

**Structure and Content of the Questionnaire**

| **Dimension** | **Sample Questions** | **Type of Question** | **Purpose** |
| --- | --- | --- | --- |
| **1. Demographic Information** | - What is your gender?  - What is your age?  - How long have you been working at the University?  - What is your type of contract?  - Which division and department are you affiliated with?  - Which course have you been teaching the longest?  - In which course could you integrate internationalization? | Multiple choice and open-ended | Characterize faculty members based on institutional and teaching profile. |
| **2. Participation in Internationalization Activities** | - What is your understanding of internationalization?  - Describe an international experience.  - How often do you collaborate with colleagues abroad?  - How often do you integrate international content into your courses?  - How often do you participate in international networks or projects?  - What factors limit your participation? | Ordinal scale and open-ended | Understand the frequency, examples, and barriers to international participation. |
| **3. Perception of Institutional Support, Opportunities, and Workload** | - How do you think the university supports your participation?  - What types of support do you consider necessary?  - Have you had opportunities to participate?  - Does your workload allow you to participate? | Multiple choice, Likert scale, and open-ended | Evaluate perceptions of institutional support and participation barriers. |
| **4. Perceived Benefits** | - Does internationalization improve your academic networks?  - Does it increase collaboration opportunities?  - Do you receive institutional recognition?  - Does it influence your teaching practice?  - Does it help you develop intercultural competencies?  - How does it contribute to your professional development? | Likert scale and open-ended | Identify perceived benefits of international participation. |
| **5. Administrative Support and Processes** | - Are you familiar with the Internationalization Office?  - Have you completed any administrative procedures with this Office?  - Do you have questions about their services?  - Are the administrative processes easy?  - Is the information clear and useful? | Dichotomous, Likert scale, and open-ended | Assess experience with administrative processes and institutional communication. |
| **6. Proficiency in a Second Language** | - Are you fluent in a second language?  - Which language(s) do you speak?  - Has language been a barrier?  - Would improving your language skills increase your opportunities?  - Do you hold a valid certification?  - What challenges have you faced because of language barriers? | Dichotomous, Likert scale, and open-ended | Explore how language proficiency influences international participation. |
| **7. Technopedagogical Competencies** | - Do you have the necessary technological skills for teaching?  - Have technologies facilitated your participation in international activities?  - Does the university provide adequate technological support?  - What challenges have you encountered using technology internationally? | Likert scale and open-ended | Measure self-perception of the use of technologies in international contexts. |
| **8. Interest in Internationalization Training** | - Are you interested in participating in an internationalization training program?  - Which learning modality would you prefer? (face-to-face, online synchronous, online asynchronous, hybrid)  - How much time per week can you dedicate to it?  - Which topics would you find relevant?  - Any comments or suggestions regarding the training? | Dichotomous, multiple choice, and open-ended | Assess interest, preferred modality, and key topics for training programs. |

**Instrument Characteristics**

**Total questions:** 48 (30 closed-ended and 18 open-ended).

**Estimated response time:** 15–20 minutes.

**Application:** Online, through an institutional form.

**Scales used:**

- - 5-point Likert scale (1 = Strongly disagree / Not beneficial; 5 = Strongly agree / Very beneficial).
  - Dichotomous questions (Yes/No).
  - Multiple-choice and open-ended questions.
